# Supplementary material
Source: Research Square preprint supplement (doi:10.21203/rs.3.rs-9639294/v1)
Supplement: Supplementary file 1 [file 0121987f2dd59db9f826f06b.pdf]

| categories                                | gene_id       | descrip                                          | GO process                       | GO process description                                                                          | log2FoldChange | padj        |
|-------------------------------------------|---------------|--------------------------------------------------|----------------------------------|-------------------------------------------------------------------------------------------------|----------------|-------------|
| Cell Signaling (Kinases and Phosphatases) | PF3D7_1104900 | calcium/calmodulin-dependent protein kinase put  | GO:0006468                       | protein phosphorylation                                                                         | 3,101020035    | 0,022589027 |
|                                           | PF3D7_1228300 | NIMA related kinase 1                            | GO:0006468                       | protein phosphorylation                                                                         | 3,00756132     | 0,005867392 |
|                                           | PF3D7_0417800 | cdc2-related protein kinase 1                    | GO:0006468                       | protein phosphorylation                                                                         | 2,821179987    | 0,015252056 |
|                                           | PF3D7_0214600 | serine/threonine protein kinase putative         | GO:0006468                       | protein phosphorylation                                                                         | 2,582051921    | 0,001203328 |
|                                           | PF3D7_0731400 | serine/threonine protein kinase FIKK family      | N/A                              | N/A                                                                                             | 2,221740929    | 0,022380124 |
|                                           | PF3D7_1471400 | diacylglycerol kinase putative                   | GO:0007205;GO:0007165            | protein kinase C-activating G protein-coupled receptor signaling pathway;signal transduction    | 2,209492488    | 0,02336011  |
|                                           | PF3D7_1009600 | protein phosphatase putative                     | N/A                              | N/A                                                                                             | 2,168610618    | 0,047635087 |
|                                           | PF3D7_1403900 | serine/threonine protein phosphatase CPPED1 put  | N/A                              | N/A                                                                                             | 2,043680685    | 0,043329245 |
|                                           | PF3D7_1223100 | cAMP-dependent protein kinase regulatory subunit | GO:0001932                       | regulation of protein phosphorylation                                                           | 1,960034235    | 0,045261484 |
|                                           | PF3D7_1208900 | protein phosphatase putative                     | N/A                              | N/A                                                                                             | 1,751153311    | 0,005984697 |
|                                           | PF3D7_0802600 | adenylyl cyclase beta                            | GO:0009190;GO:0035556            | cyclic nucleotide biosynthetic process;intracellular signal transduction                        | 1,707061791    | 0,010207204 |
|                                           | PF3D7_0810500 | protein phosphatase PPM7 putative                | GO:0006470                       | protein dephosphorylation                                                                       | 1,541041009    | 0,024607748 |
|                                           | PF3D7_0726200 | serine/threonine protein kinase FIKK family      | GO:0006468                       | protein phosphorylation                                                                         | 1,5173444      | 0,040527129 |
|                                           | PF3D7_0314400 | serine/threonine protein phosphatase 6 putative  | N/A                              | N/A                                                                                             | 1,498404783    | 0,048933745 |
|                                           | PF3D7_1138400 | guanylyl cyclase                                 | GO:0009190;GO:0035556;GO:0015914 | cyclic nucleotide biosynthetic process;intracellular signal transduction;phospholipid transport | 1,43844958     | 0,036975048 |
|                                           | PF3D7_1124600 | ethanolamine kinase                              | N/A                              | N/A                                                                                             | 1,393682119    | 0,047391842 |

|                                                     |               |                                                    |                       |                                                                                             |             |             |
|-----------------------------------------------------|---------------|----------------------------------------------------|-----------------------|---------------------------------------------------------------------------------------------|-------------|-------------|
|                                                     | PF3D7_0515300 | phosphatidylinositol 3-kinase                      | GO:0046854;GO:0048015 | phosphatidylinositol phosphate biosynthetic process;phosphatidylinositol-mediated signaling | 1,378101292 | 0,043329245 |
| Host Invasion and Interaction<br>(Export & Surface) | PF3D7_0808200 | plasmepsin X                                       | GO:0006508            | proteolysis                                                                                 | 3,262771153 | 0,000196557 |
|                                                     | PF3D7_1478300 | Plasmodium exported protein unknown function       | N/A                   | N/A                                                                                         | 3,064923656 | 0,034401626 |
|                                                     | PF3D7_0410000 | erythrocyte vesicle protein 1                      | N/A                   | N/A                                                                                         | 2,987940321 | 0,003982503 |
|                                                     | PF3D7_1335000 | MSP7-like protein                                  | N/A                   | N/A                                                                                         | 2,900655605 | 0,034658049 |
|                                                     | PF3D7_1102300 | Plasmodium exported protein unknown function       | N/A                   | N/A                                                                                         | 2,691216082 | 0,000211098 |
|                                                     | PF3D7_0800700 | surface-associated interspersed protein 8.3 (SURF1 | N/A                   | N/A                                                                                         | 2,549877186 | 0,001515505 |
|                                                     | PF3D7_0103900 | parasite-infected erythrocyte surface protein      | N/A                   | N/A                                                                                         | 2,375910056 | 0,000363152 |
|                                                     | PF3D7_1478600 | EMP1-trafficking protein                           | N/A                   | N/A                                                                                         | 2,312061034 | 0,00226814  |
|                                                     | PF3D7_0500800 | mature parasite-infected erythrocyte surface antig | N/A                   | N/A                                                                                         | 2,2072507   | 0,021769006 |
|                                                     | PF3D7_0930300 | merozoite surface protein 1                        | GO:0009405            | obsolete pathogenesis                                                                       | 2,136624313 | 0,04706778  |
|                                                     | PF3D7_1323500 | plasmepsin V                                       | GO:0006508            | proteolysis                                                                                 | 2,057697683 | 0,015795882 |

|  |               |                                                    |            |                             |             |             |
|--|---------------|----------------------------------------------------|------------|-----------------------------|-------------|-------------|
|  | PF3D7_0831100 | surface-associated interspersed protein 8.1 (SURFI | N/A        | N/A                         | 2,033472366 | 0,043329245 |
|  | PF3D7_0301700 | Plasmodium exported protein unknown function       | N/A        | N/A                         | 2,005312108 | 0,020441746 |
|  | PF3D7_1452000 | rhostry neck protein 2                             | N/A        | N/A                         | 1,843214798 | 0,036975048 |
|  | PF3D7_0201500 | Plasmodium exported protein (hyp9) unknown func    | N/A        | N/A                         | 1,803854001 | 0,021346347 |
|  | PF3D7_0113400 | Plasmodium exported protein unknown function       | N/A        | N/A                         | 1,647705425 | 0,012545384 |
|  | PF3D7_0731500 | erythrocyte binding antigen-175                    | GO:0009405 | obsolete pathogenesis       | 1,553084774 | 0,033147018 |
|  | PF3D7_0831400 | Plasmodium exported protein unknown function       | N/A        | N/A                         | 1,460945089 | 0,040527129 |
|  | PF3D7_0101100 | exported protein family 4                          | N/A        | N/A                         | 1,458358688 | 0,040840908 |
|  | PF3D7_0324300 | exported protein family 4                          | N/A        | N/A                         | 1,458358688 | 0,040840908 |
|  | PF3D7_1115300 | cysteine proteinase falcipain 2b                   | GO:0006508 | proteolysis                 | 1,419833745 | 0,048555236 |
|  | PF3D7_1327600 | nicotinate-nucleotide adenyltransferase            | GO:0009058 | biosynthetic process        | 3,169853946 | 0,004821251 |
|  | PF3D7_0920000 | long chain fatty acid elongation enzyme putativ    | N/A        | N/A                         | 2,952323112 | 0,010882188 |
|  | PF3D7_0422000 | steroid dehydrogenase putative                     | GO:0055114 | oxidation-reduction process | 2,681807198 | 0,001904783 |

|                                      |               |                                                    |                       |                                                                    |             |             |
|--------------------------------------|---------------|----------------------------------------------------|-----------------------|--------------------------------------------------------------------|-------------|-------------|
| Metabolism and Organelle Homeostasis | PF3D7_1469600 | biotin carboxylase subunit of acetyl CoA carboxyla | GO:2001295            | malonyl-CoA biosynthetic process                                   | 2,589862501 | 0,000703594 |
|                                      | PF3D7_0306400 | FAD-dependent glycerol-3-phosphate dehydrogenase%2 | GO:0006072;GO:0055114 | glycerol-3-phosphate metabolic process;oxidation-reduction process | 2,215372103 | 0,033545112 |
|                                      | PF3D7_1124500 | pyruvate dehydrogenase E1 component subunit alpha  | N/A                   | N/A                                                                | 2,192177324 | 0,013029873 |
|                                      | PF3D7_1415700 | serine C-palmitoyltransferase putative             | GO:0009058            | biosynthetic process                                               | 2,147721862 | 0,021539238 |
|                                      | PF3D7_1401500 | lysophospholipase putative                         | N/A                   | N/A                                                                | 2,108995013 | 0,012816886 |
|                                      | PF3D7_1477900 | acyl-CoA synthetase pseudogene                     | N/A                   | N/A                                                                | 1,796153963 | 0,039788998 |
|                                      | PF3D7_1147500 | protein farnesyltransferase subunit beta           | GO:0018343            | protein farnesylation                                              | 1,580438133 | 0,027987226 |
|                                      | PF3D7_0215300 | acyl-CoA synthetase                                | N/A                   | N/A                                                                | 1,540582182 | 0,029825831 |
|                                      | PF3D7_0319000 | P-type ATPase putative                             | GO:0015914            | phospholipid transport                                             | 1,471492472 | 0,021346347 |
|                                      | PF3D7_0723700 | metallo-hydrolase/oxidoreductase putative          | N/A                   | N/A                                                                | 1,421481356 | 0,047911513 |
|                                      | PF3D7_1352100 | ABC transporter B family member 6 putative         | GO:0055085            | transmembrane transport                                            | 1,360124338 | 0,049211024 |
|                                      | PF3D7_0926700 | glutamine-dependent NAD(+) synthetase putative     | GO:0009435            | NAD biosynthetic process                                           | 1,331279696 | 0,043329245 |

|                                 |               |                                                    |            |                                       |             |             |
|---------------------------------|---------------|----------------------------------------------------|------------|---------------------------------------|-------------|-------------|
|                                 | PF3D7_1406600 | ATP-dependent Clp protease regulatory subunit ClpC | N/A        | N/A                                   | 4,151153123 | 0,00513642  |
|                                 | PF3D7_0609400 | mitochondrial cardiolipin synthase putative        | N/A        | N/A                                   | 1,986747503 | 0,028831454 |
| Protein Machinery and Structure | PF3D7_1140500 | myosin F putative                                  | N/A        | N/A                                   | 4,164733931 | 0,011953888 |
|                                 | PF3D7_1102200 | DnaJ protein putative                              | N/A        | N/A                                   | 4,132781247 | 0,000786453 |
|                                 | PF3D7_1210000 | 50S ribosomal protein L1 apicoplast putative       | N/A        | N/A                                   | 3,375651668 | 0,022528364 |
|                                 | PF3D7_0504700 | centrosomal protein CEP120 putative                | N/A        | N/A                                   | 3,221609128 | 0,006361272 |
|                                 | PF3D7_1431600 | succinyl-CoA ligase [ADP-forming] subunit beta     | GO:0006099 | tricarboxylic acid cycle              | 3,013178599 | 0,003910741 |
|                                 | PF3D7_1219000 | formin 2                                           | N/A        | N/A                                   | 2,72796563  | 0,000326922 |
|                                 | PF3D7_1201100 | RESA-like protein with PHIST and DnaJ domains      | N/A        | N/A                                   | 2,536132195 | 0,019634166 |
|                                 | PF3D7_1333200 | ubiquitin-activating enzyme                        | GO:0006464 | cellular protein modification process | 2,474486753 | 0,001298715 |
|                                 | PF3D7_1469000 | translation initiation factor IF-1                 | GO:0006413 | translational initiation              | 2,40570558  | 0,029740816 |
|                                 | PF3D7_1473700 | nucleoporin NUP116/NSP116 putative                 | N/A        | N/A                                   | 2,009236489 | 0,020412047 |
|                                 | PF3D7_0407900 | AAA family ATPase putative                         | N/A        | N/A                                   | 1,763711476 | 0,033545112 |
|                                 | PF3D7_0708500 | heat shock protein 86 family protein               | N/A        | N/A                                   | 1,387974551 | 0,007951166 |
|                                 | PF3D7_0707400 | AAA family ATPase putative                         | GO:0007005 | mitochondrion organization            | 1,242870201 | 0,036749419 |
|                                 | PF3D7_1350900 | transcription factor with AP2 domain(s)            | N/A        | N/A                                   | 3,986255864 | 0,000364506 |

|  |               |                                                 |                       |                                                     |             |             |
|--|---------------|-------------------------------------------------|-----------------------|-----------------------------------------------------|-------------|-------------|
|  | PF3D7_0910900 | DNA primase large subunit putative              | GO:0006269            | DNA replication, synthesis of RNA primer            | 3,566993987 | 0,000877569 |
|  | PF3D7_0414000 | structural maintenance of chromosomes protein 3 | GO:0051301;GO:0051276 | cell division;chromosome organization               | 2,825992808 | 0,018951068 |
|  | PF3D7_0711400 | histone deacetylase complex subunit SAP18 putat | N/A                   | N/A                                                 | 2,608893204 | 0,00167544  |
|  | PF3D7_0501800 | chromosome assembly factor 1                    | GO:0006325;GO:0006351 | chromatin organization;transcription, DNA-templated | 2,600471231 | 0,034658049 |
|  | PF3D7_1211700 | DNA replication licensing factor MCM5 putative  | GO:0032508;GO:0006260 | DNA duplex unwinding;DNA replication                | 2,582209381 | 0,001624423 |
|  | PF3D7_0314700 | zinc finger protein putative                    | N/A                   | N/A                                                 | 2,434017804 | 0,043063088 |
|  | PF3D7_0203900 | 5'-3' exonuclease N-terminal resolvase-like dom | GO:0006261            | DNA-dependent DNA replication                       | 2,39798288  | 0,044202955 |
|  | PF3D7_0725000 | exonuclease I putative                          | GO:0006281            | DNA repair                                          | 2,379662936 | 0,001515505 |
|  | PF3D7_1429200 | transcription factor with AP2 domain(s) putativ | GO:0006355            | regulation of transcription, DNA-templated          | 2,367319287 | 0,021346347 |

|                                                        |               |                                                 |                       |                                            |             |             |
|--------------------------------------------------------|---------------|-------------------------------------------------|-----------------------|--------------------------------------------|-------------|-------------|
| Replication, Transcription, and Chromatin Modification | PF3D7_1318400 | structural maintenance of chromosomes protein 2 | GO:0051301;GO:0051276 | cell division;chromosome organization      | 2,302043104 | 0,022528364 |
|                                                        | PF3D7_1356600 | regulator of chromosome condensation putative   | N/A                   | N/A                                        | 2,17824082  | 0,020412047 |
|                                                        | PF3D7_0925700 | histone deacetylase 1                           | GO:0016575            | histone deacetylation                      | 2,175190147 | 0,000877569 |
|                                                        | PF3D7_1013000 | zinc finger protein putative                    | N/A                   | N/A                                        | 2,147538838 | 0,040840908 |
|                                                        | PF3D7_1314200 | telomerase reverse transcriptase                | N/A                   | N/A                                        | 2,062587269 | 0,00929503  |
|                                                        | PF3D7_0411900 | DNA polymerase alpha catalytic subunit A        | N/A                   | N/A                                        | 2,00987268  | 0,033448901 |
|                                                        | PF3D7_1106600 | DEAD/DEAH box helicase putative                 | N/A                   | N/A                                        | 1,830681841 | 0,010854646 |
|                                                        | PF3D7_0411400 | DEAD box ATP-dependent RNA helicase putative    | N/A                   | N/A                                        | 1,800951101 | 0,021386543 |
|                                                        | PF3D7_0204600 | 5'-3' exonuclease putative                      | GO:0000956            | nuclear-transcribed mRNA catabolic process | 1,559308571 | 0,048555236 |

|                                                       |               |                                               |                                                                |                                                                                                                                   |             |             |
|-------------------------------------------------------|---------------|-----------------------------------------------|----------------------------------------------------------------|-----------------------------------------------------------------------------------------------------------------------------------|-------------|-------------|
|                                                       | PF3D7_0510500 | topoisomerase I                               | GO:0006265                                                     | DNA topological change                                                                                                            | 1,431548838 | 0,005867392 |
|                                                       | PF3D7_0711500 | regulator of chromosome condensation putative | N/A                                                            | N/A                                                                                                                               | 1,35146086  | 0,042952633 |
|                                                       | PF3D7_0420300 | transcription factor with AP2 domain(s)       | GO:0006355                                                     | regulation of transcription, DNA-templated                                                                                        | 1,325875648 | 0,018106973 |
|                                                       | PF3D7_0516300 | tRNA pseudouridine synthase putative          | GO:0009451;GO:0001522                                          | RNA modification;pseudouridine synthesis                                                                                          | 1,322049787 | 0,024607748 |
|                                                       | PF3D7_0827800 | SET domain protein putative                   | N/A                                                            | N/A                                                                                                                               | 1,116542735 | 0,029740816 |
|                                                       | PF3D7_0308600 | pre-mRNA-processing factor 19 putative        | GO:0006281;GO:0000398;<br>GO:0007023;GO:0016567;<br>GO:0007021 | DNA repair;mRNA splicing, via spliceosome;post-chaperonin tubulin folding pathway;protein ubiquitination;tubulin complex assembly | 1,076822201 | 0,043329245 |
| Sexual Stage Development<br>(Gametocytes / Ookinetes) | PF3D7_1404300 | secreted ookinete adhesive protein putative   | N/A                                                            | N/A                                                                                                                               | 4,460298952 | 0,001218099 |
|                                                       | PF3D7_0320400 | oocyst capsule protein                        | N/A                                                            | N/A                                                                                                                               | 3,696350544 | 0,000598654 |
|                                                       | PF3D7_0408600 | sporozoite invasion-associated protein 1      | N/A                                                            | N/A                                                                                                                               | 3,203054022 | 0,027987226 |

|  |               |                                                    |                       |                                                            |             |             |
|--|---------------|----------------------------------------------------|-----------------------|------------------------------------------------------------|-------------|-------------|
|  | PF3D7_0202400 | gamete antigen 27/25 putative                      | N/A                   | N/A                                                        | 2,448375922 | 0,015007902 |
|  | PF3D7_0315200 | circumsporozoite- and TRAP-related protein         | N/A                   | N/A                                                        | 2,176648054 | 0,007299904 |
|  | PF3D7_0729100 | conserved Plasmodium protein unknown function      | GO:0000256            | allantoin catabolic process                                | 2,671354491 | 0,010207204 |
|  | PF3D7_1440500 | allantoicase putative                              | GO:0000256            | allantoin catabolic process                                | 2,274562744 | 0,033809873 |
|  | PF3D7_0216600 | MtN3-like protein                                  | GO:0008643            | carbohydrate transport                                     | 1,238880247 | 0,037623616 |
|  | PF3D7_0619400 | cell division cycle protein 48 homologue putati    | GO:0051301            | cell division                                              | 1,335856952 | 0,040527129 |
|  | PF3D7_0322400 | regulator of initiation factor 2 (eIF2)            | GO:0051301            | cell division                                              | 1,224282403 | 0,040527129 |
|  | PF3D7_0923800 | thioredoxin reductase                              | GO:0045454;GO:0055114 | cell redox homeostasis;oxidation-reduction process         | 2,262744002 | 0,000932498 |
|  | PF3D7_0508800 | single-stranded DNA-binding protein                | GO:0006260            | DNA replication                                            | 3,860666092 | 0,009724848 |
|  | PF3D7_1145100 | coatomer subunit gamma putative                    | GO:0006886;GO:0016192 | intracellular protein transport;vesicle-mediated transport | 2,598069449 | 0,000598654 |
|  | PF3D7_1209400 | cytosolic iron-sulfur protein assembly protein 1%2 | GO:0016226            | iron-sulfur cluster assembly                               | 2,773763584 | 0,017244908 |
|  | PF3D7_1330500 | conserved Plasmodium protein unknown function      | GO:0045721            | negative regulation of gluconeogenesis                     | 1,473050386 | 0,048481532 |
|  | PF3D7_1238700 | conserved Plasmodium protein unknown function      | GO:0051260            | protein homooligomerization                                | 3,338699085 | 0,021346347 |
|  | PF3D7_0207800 | serine repeat antigen 3                            | GO:0006508            | proteolysis                                                | 3,978581662 | 5,06825E-05 |
|  | PF3D7_1136900 | subtilisin-like protease 2                         | GO:0006508            | proteolysis                                                | 2,563755575 | 0,007299904 |
|  | PF3D7_1235200 | V-type K+-independent H+-translocating inorganic p | GO:1902600            | proton transmembrane transport                             | 2,545093368 | 0,010517002 |
|  | PF3D7_0526500 | conserved Plasmodium protein unknown function      | GO:0006396;GO:0006397 | RNA processing;mRNA processing                             | 1,103715266 | 0,030939179 |
|  | PF3D7_1132400 | conserved Plasmodium membrane protein unknown f    | GO:0055085            | transmembrane transport                                    | 2,682406681 | 0,001085369 |

|  |               |                                                 |                       |                                              |             |             |
|--|---------------|-------------------------------------------------|-----------------------|----------------------------------------------|-------------|-------------|
|  | PF3D7_0112200 | multidrug resistance-associated protein 1       | GO:0055085;GO:0042908 | transmembrane transport;xenobiotic transport | 3,007858396 | 0,002393288 |
|  | PF3D7_0407800 | conserved Plasmodium protein unknown function   | N/A                   | N/A                                          | 6,515979645 | 0,000328262 |
|  | PF3D7_1035300 | glutamate-rich protein                          | N/A                   | N/A                                          | 5,108701806 | 0,000683122 |
|  | PF3D7_1313600 | conserved Plasmodium protein unknown function   | N/A                   | N/A                                          | 4,992974808 | 1,30083E-05 |
|  | PF3D7_1326600 | conserved Plasmodium protein unknown function   | N/A                   | N/A                                          | 4,779660285 | 0,002569602 |
|  | PF3D7_0423700 | early transcribed membrane protein 4            | N/A                   | N/A                                          | 3,758303357 | 0,000765256 |
|  | PF3D7_1023700 | conserved Plasmodium protein unknown function   | N/A                   | N/A                                          | 3,594793305 | 0,002391132 |
|  | PF3D7_1326500 | conserved Plasmodium protein unknown function   | N/A                   | N/A                                          | 3,410412136 | 0,001431145 |
|  | PF3D7_0508900 | conserved Plasmodium protein unknown function   | N/A                   | N/A                                          | 3,370516148 | 0,001966138 |
|  | PF3D7_1146800 | conserved Plasmodium protein unknown function   | N/A                   | N/A                                          | 3,286225181 | 0,016510923 |
|  | PF3D7_1301200 | glycophorin binding protein                     | N/A                   | N/A                                          | 3,27217886  | 0,006179259 |
|  | PF3D7_1362700 | conserved Plasmodium protein unknown function   | N/A                   | N/A                                          | 3,223555801 | 0,008769271 |
|  | PF3D7_0927600 | RNA-binding protein putative                    | N/A                   | N/A                                          | 3,125679891 | 0,021539238 |
|  | PF3D7_1141100 | conserved Plasmodium protein unknown function   | N/A                   | N/A                                          | 3,120522895 | 0,001085369 |
|  | PF3D7_0414700 | GTP-binding protein putative                    | N/A                   | N/A                                          | 3,086545098 | 0,039337152 |
|  | PF3D7_1019700 | conserved Plasmodium protein unknown function   | N/A                   | N/A                                          | 3,016041161 | 0,022380124 |
|  | PF3D7_0424200 | reticulocyte binding protein homologue 4        | N/A                   | N/A                                          | 2,972952837 | 0,007299904 |
|  | PF3D7_0811600 | conserved Plasmodium protein unknown function   | N/A                   | N/A                                          | 2,939530161 | 0,002827102 |
|  | PF3D7_0307900 | conserved Plasmodium protein unknown function   | N/A                   | N/A                                          | 2,892671341 | 0,012024356 |
|  | PF3D7_0903300 | conserved Plasmodium membrane protein unknown f | N/A                   | N/A                                          | 2,849972309 | 0,021539238 |
|  | PF3D7_1014300 | conserved protein unknown function              | N/A                   | N/A                                          | 2,80027032  | 0,000159918 |

|                  |               |                                                |     |     |             |             |
|------------------|---------------|------------------------------------------------|-----|-----|-------------|-------------|
| Unassigned genes | PF3D7_1322400 | conserved Plasmodium protein unknown function  | N/A | N/A | 2,781254001 | 0,018724994 |
|                  | PF3D7_0321100 | conserved Plasmodium protein unknown function  | N/A | N/A | 2,757273954 | 0,02514875  |
|                  | PF3D7_1322300 | conserved Plasmodium protein unknown function  | N/A | N/A | 2,75468849  | 0,033545112 |
|                  | PF3D7_1415600 | conserved Plasmodium protein unknown function  | N/A | N/A | 2,706019606 | 0,009187573 |
|                  | PF3D7_1423500 | conserved Plasmodium protein unknown function  | N/A | N/A | 2,604364413 | 0,002391132 |
|                  | PF3D7_1474000 | probable protein unknown function              | N/A | N/A | 2,578988    | 0,022528364 |
|                  | PF3D7_0915500 | conserved Plasmodium protein unknown function  | N/A | N/A | 2,577572337 | 0,028091538 |
|                  | PF3D7_0522100 | conserved Plasmodium protein unknown function  | N/A | N/A | 2,482465909 | 0,021346347 |
|                  | PF3D7_1328000 | conserved Plasmodium protein unknown function  | N/A | N/A | 2,477987365 | 0,011599884 |
|                  | PF3D7_1221700 | FbpA domain protein putative                   | N/A | N/A | 2,475735329 | 0,039337152 |
|                  | PF3D7_0404500 | 6-cysteine protein                             | N/A | N/A | 2,440034538 | 0,007001734 |
|                  | PF3D7_0411800 | conserved Plasmodium protein unknown function  | N/A | N/A | 2,400906859 | 0,042557726 |
|                  | PF3D7_0103400 | zinc-carboxypeptidase putative                 | N/A | N/A | 2,368567037 | 0,00167544  |
|                  | PF3D7_0914900 | BSD-domain protein putative                    | N/A | N/A | 2,360115311 | 0,001270395 |
|                  | PF3D7_1310700 | RNA-binding protein putative                   | N/A | N/A | 2,325730011 | 0,033516759 |
|                  | PF3D7_1314000 | conserved Plasmodium protein unknown function  | N/A | N/A | 2,32430752  | 0,049211024 |
|                  | PF3D7_1449200 | conserved Plasmodium protein unknown function  | N/A | N/A | 2,313776082 | 0,02066629  |
|                  | PF3D7_1317700 | conserved Plasmodium protein unknown function  | N/A | N/A | 2,228041004 | 0,013261644 |
|                  | PF3D7_1218000 | thrombospondin-related apical membrane protein | N/A | N/A | 2,15569181  | 0,043329245 |
|                  | PF3D7_1328500 | alpha/beta-hydrolase putative                  | N/A | N/A | 2,154192996 | 0,008617557 |
|                  | PF3D7_1131800 | oxysterol-binding protein putative             | N/A | N/A | 2,103355448 | 0,026577172 |
|                  | PF3D7_0926500 | conserved Plasmodium protein unknown function  | N/A | N/A | 2,102087354 | 0,039877558 |

|  |               |                                                    |     |     |             |             |
|--|---------------|----------------------------------------------------|-----|-----|-------------|-------------|
|  | PF3D7_0305100 | conserved Plasmodium protein<br>unknown function   | N/A | N/A | 2,088017136 | 0,019394125 |
|  | PF3D7_1009500 | metalloprotease putative                           | N/A | N/A | 2,075103323 | 0,043329245 |
|  | PF3D7_1442400 | conserved Plasmodium protein<br>unknown function   | N/A | N/A | 2,074342061 | 0,004687285 |
|  | PF3D7_0920400 | conserved Plasmodium protein<br>unknown function   | N/A | N/A | 2,053677482 | 0,014941035 |
|  | PF3D7_0410700 | ribosome biogenesis GTPase A<br>putative           | N/A | N/A | 2,006043715 | 0,041311933 |
|  | PF3D7_0531000 | conserved Plasmodium protein<br>unknown function   | N/A | N/A | 1,998657779 | 0,027989859 |
|  | PF3D7_0723300 | conserved Plasmodium protein<br>unknown function   | N/A | N/A | 1,998185073 | 0,00154775  |
|  | PF3D7_1448300 | conserved Plasmodium protein<br>unknown function   | N/A | N/A | 1,995456767 | 0,002240249 |
|  | PF3D7_0620000 | conserved Plasmodium protein<br>unknown function   | N/A | N/A | 1,973630028 | 0,030601773 |
|  | PF3D7_1019100 | conserved Plasmodium protein<br>unknown function   | N/A | N/A | 1,963002726 | 0,045649949 |
|  | PF3D7_1016900 | early transcribed membrane protein<br>10.3         | N/A | N/A | 1,960766699 | 0,029158625 |
|  | PF3D7_1335300 | reticulocyte binding protein 2<br>homologue b      | N/A | N/A | 1,95207662  | 0,027987226 |
|  | PF3D7_1466200 | conserved Plasmodium protein<br>unknown function   | N/A | N/A | 1,915706233 | 0,018951068 |
|  | PF3D7_1418800 | signal recognition particle RNA                    | N/A | N/A | 1,896898132 | 0,047664696 |
|  | PF3D7_0526600 | conserved Plasmodium protein<br>unknown function   | N/A | N/A | 1,872513879 | 0,040527129 |
|  | PF3D7_0629400 | RNA-binding protein putative                       | N/A | N/A | 1,851439003 | 0,048555236 |
|  | PF3D7_1455300 | conserved Plasmodium protein<br>unknown function   | N/A | N/A | 1,839812156 | 0,028230984 |
|  | PF3D7_1474200 | conserved Plasmodium membrane<br>protein unknown f | N/A | N/A | 1,818808204 | 0,040527129 |
|  | PF3D7_1355600 | conserved Plasmodium protein<br>unknown function   | N/A | N/A | 1,81713771  | 0,034658049 |
|  | PF3D7_1348400 | conserved Plasmodium membrane<br>protein unknown f | N/A | N/A | 1,75385257  | 0,040840908 |
|  | PF3D7_1243900 | double C2-like domain-containing<br>protein        | N/A | N/A | 1,73454416  | 0,043329245 |

|               |                                                  |     |     |             |             |
|---------------|--------------------------------------------------|-----|-----|-------------|-------------|
| PF3D7_1227600 | cyclin related protein putative                  | N/A | N/A | 1,729588063 | 0,022380124 |
| PF3D7_0104600 | conserved Plasmodium protein<br>unknown function | N/A | N/A | 1,710115895 | 0,030601773 |
| PF3D7_1317300 | conserved Plasmodium protein<br>unknown function | N/A | N/A | 1,70395726  | 0,017244908 |
| PF3D7_1343300 | conserved Plasmodium protein<br>unknown function | N/A | N/A | 1,699672192 | 0,027846213 |
| PF3D7_1013200 | conserved Plasmodium protein<br>unknown function | N/A | N/A | 1,655029227 | 0,010854646 |
| PF3D7_1305900 | conserved Plasmodium protein<br>unknown function | N/A | N/A | 1,654493659 | 0,047251705 |
| PF3D7_0307700 | conserved Plasmodium protein<br>unknown function | N/A | N/A | 1,649099955 | 0,043661457 |
| PF3D7_0520800 | conserved Plasmodium protein<br>unknown function | N/A | N/A | 1,636809878 | 0,037623616 |
| PF3D7_1003600 | inner membrane complex protein 1c<br>putative    | N/A | N/A | 1,625941328 | 0,048933745 |
| PF3D7_0304000 | inner membrane complex protein 1a<br>putative    | N/A | N/A | 1,615768762 | 0,045163631 |
| PF3D7_1344100 | krox-like protein putative                       | N/A | N/A | 1,614067937 | 0,04718274  |
| PF3D7_0104200 | StAR-related lipid transfer protein              | N/A | N/A | 1,610709387 | 0,021922258 |
| PF3D7_1327300 | conserved Plasmodium protein<br>unknown function | N/A | N/A | 1,554821211 | 0,033448901 |
| PF3D7_0504800 | conserved Plasmodium protein<br>unknown function | N/A | N/A | 1,545391142 | 0,046757926 |
| PF3D7_1359600 | conserved Plasmodium protein<br>unknown function | N/A | N/A | 1,414392322 | 0,044202955 |
| PF3D7_0627600 | conserved Plasmodium protein<br>unknown function | N/A | N/A | 1,411962887 | 0,040840908 |
| PF3D7_0923400 | conserved Plasmodium protein<br>unknown function | N/A | N/A | 1,401810898 | 0,021514754 |
| PF3D7_1354900 | conserved Plasmodium protein<br>unknown function | N/A | N/A | 1,387786846 | 0,028831454 |
| PF3D7_0703200 | conserved Plasmodium protein<br>unknown function | N/A | N/A | 1,361058336 | 0,043329245 |
| PF3D7_1237500 | conserved Plasmodium protein<br>unknown function | N/A | N/A | 1,250895211 | 0,047712271 |

|  |               |                                                  |     |     |             |             |
|--|---------------|--------------------------------------------------|-----|-----|-------------|-------------|
|  | PF3D7_1140800 | conserved Plasmodium protein<br>unknown function | N/A | N/A | 1,226020502 | 0,040527129 |
|  | PF3D7_0506500 | conserved Plasmodium protein<br>unknown function | N/A | N/A | 1,139978387 | 0,047712271 |

|                                |               |                                                       |                                      |                                                                                           |              |             |
|--------------------------------|---------------|-------------------------------------------------------|--------------------------------------|-------------------------------------------------------------------------------------------|--------------|-------------|
| DNA Dynamics and Transcription | PF3D7_1006800 | single-strand telomeric DNA-binding<br>protein GBP2%2 | N/A                                  | N/A                                                                                       | -1,11284192  | 0,040840908 |
|                                | PF3D7_1314900 | general transcription factor IIH<br>subunit 2         | GO:0006281;GO:0006289;<br>GO:0006351 | DNA repair;nucleotide-excision<br>repair;transcription, DNA-<br>templated                 | -1,203406959 | 0,031816209 |
|                                | PF3D7_0320900 | histone H2A variant putative                          | N/A                                  | N/A                                                                                       | -1,223529056 | 0,048933745 |
|                                | PF3D7_1343400 | DNA repair protein RAD5 putative                      | N/A                                  | N/A                                                                                       | -1,234172518 | 0,036333116 |
|                                | PF3D7_0110400 | DNA-directed RNA polymerase II<br>subunit RPB9 put    | GO:0006379;GO:0006351                | mRNA cleavage;transcription, DNA-<br>templated                                            | -1,259781308 | 0,04291599  |
|                                | PF3D7_1033600 | myb2 transcription factor putative                    | GO:0008380;GO:0006397                | RNA splicing;mRNA processing                                                              | -1,299918233 | 0,015252056 |
|                                | PF3D7_1115500 | transcription factor with AP2<br>domain(s) putativ    | GO:0006355                           | regulation of transcription, DNA-<br>templated                                            | -1,475158431 | 0,027846213 |
|                                | PF3D7_1433500 | DNA topoisomerase 2                                   | GO:0006259;GO:0006265                | DNA metabolic process;DNA<br>topological change                                           | -1,531287659 | 0,00167544  |
|                                | PF3D7_1364800 | DNA-directed RNA polymerases I II<br>and III su       | GO:0006351                           | transcription, DNA-templated                                                              | -1,698387329 | 0,005145856 |
|                                | PF3D7_1006200 | DNA/RNA-binding protein Alba 3                        | N/A                                  | N/A                                                                                       | -1,922775137 | 0,003888889 |
|                                | PF3D7_0205500 | DNA-directed RNA polymerase II 16<br>kDa subunit p    | GO:0006352;GO:0044237                | DNA-templated transcription,<br>initiation;cellular metabolic<br>process                  | -2,827726115 | 0,002473244 |
|                                | PF3D7_1037600 | DNA repair helicase RAD25 putative                    | GO:0006289;GO:0006367                | nucleotide-excision<br>repair;transcription initiation from<br>RNA polymerase II promoter | -2,898349711 | 0,000124641 |
|                                | PF3D7_0502400 | merozoite surface protein 8                           | N/A                                  | N/A                                                                                       | -1,197093167 | 0,04567814  |
|                                | PF3D7_1002000 | Plasmodium exported protein (hyp2)<br>unknown func    | N/A                                  | N/A                                                                                       | -1,322036251 | 0,027145337 |
|                                | PF3D7_1149200 | ring-infected erythrocyte surface<br>antigen          | N/A                                  | N/A                                                                                       | -1,357164777 | 0,029740816 |

|                               |               |                                                 |                       |                                                                        |              |             |
|-------------------------------|---------------|-------------------------------------------------|-----------------------|------------------------------------------------------------------------|--------------|-------------|
| Exported and Surface Proteins | PF3D7_0206800 | merozoite surface protein 2                     | GO:0007155            | cell adhesion                                                          | -1,36364772  | 0,046197178 |
|                               | PF3D7_1201400 | Plasmodium exported protein unknown function    | N/A                   | N/A                                                                    | -1,554117507 | 0,034401626 |
|                               | PF3D7_1148800 | Plasmodium exported protein (hyp11) unknown fun | N/A                   | N/A                                                                    | -1,587233805 | 0,026701656 |
|                               | PF3D7_0301800 | Plasmodium exported protein unknown function    | N/A                   | N/A                                                                    | -1,692965367 | 0,020370827 |
|                               | PF3D7_1038000 | antigen UB05                                    | N/A                   | N/A                                                                    | -1,719996743 | 0,006302634 |
|                               | PF3D7_0304600 | circumsporozoite (CS) protein                   | N/A                   | N/A                                                                    | -1,967406699 | 0,04291599  |
|                               | PF3D7_1463500 | fam-a protein                                   | N/A                   | N/A                                                                    | -2,360490037 | 0,003888889 |
|                               | PF3D7_0631600 | exported protein family 4                       | N/A                   | N/A                                                                    | -9,988295388 | 6,17132E-08 |
|                               | PF3D7_0601000 | exported protein family 4                       | N/A                   | N/A                                                                    | -0,290649214 | 0,020441746 |
|                               | PF3D7_0726500 | ubiquitin carboxyl-terminal hydrolase putative  | GO:0016579;GO:0006511 | protein deubiquitination;ubiquitin-dependent protein catabolic process | -1,105990012 | 0,029381577 |
|                               | PF3D7_0104300 | ubiquitin carboxyl-terminal hydrolase 1 putativ | GO:0006511            | ubiquitin-dependent protein catabolic process                          | -1,143355882 | 0,031544699 |
|                               | PF3D7_0305700 | ubiquitin-conjugating enzyme E2 putative        | N/A                   | N/A                                                                    | -1,150534103 | 0,041851304 |
|                               | PF3D7_1203900 | ubiquitin-conjugating enzyme E2                 | N/A                   | N/A                                                                    | -1,180178176 | 0,040527129 |
|                               | PF3D7_0803000 | peptidyl-prolyl cis-trans isomerase             | GO:0006397;GO:0000413 | mRNA processing;protein peptidyl-prolyl isomerization                  | -1,195084975 | 0,031816209 |
|                               | PF3D7_0514600 | ribose-5-phosphate isomerase putative           | GO:0009052            | pentose-phosphate shunt, non-oxidative branch                          | -1,254604155 | 0,044699098 |
|                               | PF3D7_0527100 | ubiquitin-conjugating enzyme E2 N putative      | N/A                   | N/A                                                                    | -1,310447746 | 0,043329245 |
|                               | PF3D7_1113400 | ubiquitin domain-containing protein DSK2 putati | N/A                   | N/A                                                                    | -1,499046776 | 0,004687285 |

|                             |               |                                                    |                                  |                                                                                                                                                                            |              |             |
|-----------------------------|---------------|----------------------------------------------------|----------------------------------|----------------------------------------------------------------------------------------------------------------------------------------------------------------------------|--------------|-------------|
| Homeostasis and Stress      | PF3D7_0727400 | proteasome subunit alpha type-5 putative           | GO:0043161;GO:0051603;GO:0006511 | proteasome-mediated ubiquitin-dependent protein catabolic process;proteolysis involved in cellular protein catabolic process;ubiquitin-dependent protein catabolic process | -1,521832763 | 0,020412047 |
|                             | PF3D7_1460400 | ubiquitin carboxyl-terminal hydrolase isozyme L3   | GO:0006511                       | ubiquitin-dependent protein catabolic process                                                                                                                              | -1,647139108 | 0,02137443  |
|                             | PF3D7_1427200 | selenoprotein                                      | N/A                              | N/A                                                                                                                                                                        | -1,913482511 | 0,043329245 |
|                             | PF3D7_0909300 | apoptosis-related protein                          | N/A                              | N/A                                                                                                                                                                        | -1,982992984 | 0,006361272 |
|                             | PF3D7_0623500 | superoxide dismutase [Fe]                          | GO:0055114;GO:0006801            | oxidation-reduction process;superoxide metabolic process                                                                                                                   | -2,448941986 | 0,002240249 |
|                             | PF3D7_0109600 | cold-shock protein putative                        | N/A                              | N/A                                                                                                                                                                        | -2,475161721 | 0,004687285 |
|                             | PF3D7_0501100 | heat shock protein 40 type II                      | GO:0006457                       | protein folding                                                                                                                                                            | -2,53860734  | 6,63861E-05 |
| RNA Metabolism and Splicing | PF3D7_1407300 | pre-mRNA-splicing factor 38B putative              | GO:0008380;GO:0006397            | RNA splicing;mRNA processing                                                                                                                                               | -0,949471699 | 0,034807597 |
|                             | PF3D7_0503300 | serine/arginine-rich splicing factor 12            | N/A                              | N/A                                                                                                                                                                        | -1,177390255 | 0,04263524  |
|                             | PF3D7_1133800 | RNA (uracil-5-)methyltransferase putative          | GO:0006396                       | RNA processing                                                                                                                                                             | -1,180830169 | 0,022380124 |
|                             | PF3D7_1414800 | small nuclear ribonucleoprotein-associated protein | N/A                              | N/A                                                                                                                                                                        | -1,237175341 | 0,036975048 |
|                             | PF3D7_0623100 | nuclear polyadenylated RNA-binding protein NAB2    | GO:1900364;GO:0043488            | negative regulation of mRNA polyadenylation;regulation of mRNA stability                                                                                                   | -1,255861754 | 0,022380124 |
|                             | PF3D7_1119300 | splicing factor U2AF small subunit putative        | GO:0000398                       | mRNA splicing, via spliceosome                                                                                                                                             | -1,353724353 | 0,011599884 |
|                             | PF3D7_1439100 | DEAD/DEAH box helicase putative                    | N/A                              | N/A                                                                                                                                                                        | -1,497382272 | 0,037623616 |
|                             | PF3D7_1445600 | RNA-binding protein putative                       | N/A                              | N/A                                                                                                                                                                        | -1,521026969 | 0,029381577 |
|                             | PF3D7_0205700 | RNA-binding protein putative                       | N/A                              | N/A                                                                                                                                                                        | -1,54910086  | 0,048933745 |

|  |               |                                                    |                       |                                                                |              |             |
|--|---------------|----------------------------------------------------|-----------------------|----------------------------------------------------------------|--------------|-------------|
|  | PF3D7_1465300 | tRNA 3'-trailer sequence RNase putative            | N/A                   | N/A                                                            | -1,56832483  | 0,018958326 |
|  | PF3D7_0309800 | YTH domain-containing protein putative             | N/A                   | N/A                                                            | -1,596657478 | 0,011865847 |
|  | PF3D7_0722500 | pre-mRNA-splicing factor CWC15 putative            | GO:0000398            | mRNA splicing, via spliceosome                                 | -1,62166865  | 0,010882188 |
|  | PF3D7_0610100 | pre-mRNA-splicing factor SLU7 putative             | GO:0000398            | mRNA splicing, via spliceosome                                 | -1,736655651 | 0,004123577 |
|  | PF3D7_0929200 | RNA-binding protein putative                       | N/A                   | N/A                                                            | -1,849956423 | 0,00902473  |
|  | PF3D7_0916600 | methyltransferase putative                         | N/A                   | N/A                                                            | -2,105422963 | 0,022380124 |
|  | PF3D7_1320900 | RNA-binding protein putative                       | N/A                   | N/A                                                            | -2,219460687 | 0,007959863 |
|  | PF3D7_1348200 | step II splicing factor putative                   | GO:0000398            | mRNA splicing, via spliceosome                                 | -2,351628651 | 0,007299904 |
|  | PF3D7_0720000 | exosome complex component CSL4 putative            | GO:0006396            | RNA processing                                                 | -2,486112707 | 0,002471735 |
|  | PF3D7_1423800 | vacuolar protein sorting-associated protein 3 p    | GO:0016192            | vesicle-mediated transport                                     | -1,103507393 | 0,046508342 |
|  | PF3D7_0419600 | ran-specific GTPase-activating protein 1 putati    | GO:0046907;GO:0043547 | intracellular transport;positive regulation of GTPase activity | -1,119526217 | 0,037543986 |
|  | PF3D7_1114700 | serine/threonine protein kinase putative           | GO:0006468            | protein phosphorylation                                        | -1,151311872 | 0,025109146 |
|  | PF3D7_0714300 | palmitoyltransferase DHHC4 putative                | N/A                   | N/A                                                            | -1,164595462 | 0,033809873 |
|  | PF3D7_1002100 | EMP1-trafficking protein                           | N/A                   | N/A                                                            | -1,240185736 | 0,019743865 |
|  | PF3D7_1365700 | SNARE associated Golgi protein putative            | N/A                   | N/A                                                            | -1,283023092 | 0,048288598 |
|  | PF3D7_0818200 | 14-3-3 protein                                     | N/A                   | N/A                                                            | -1,430426406 | 0,016942418 |
|  | PF3D7_1138500 | protein phosphatase 2C                             | GO:0006470            | protein dephosphorylation                                      | -1,550594756 | 0,007951166 |
|  | PF3D7_0629900 | sec14-like cytosolic factor or phosphatidylinosito | N/A                   | N/A                                                            | -1,697920192 | 0,002270461 |

|                         |               |                                                 |                       |                                                                                           |              |             |
|-------------------------|---------------|-------------------------------------------------|-----------------------|-------------------------------------------------------------------------------------------|--------------|-------------|
| Signaling and Transport | PF3D7_1361100 | protein transport protein Sec24A                | GO:0006888;GO:0006886 | endoplasmic reticulum to Golgi vesicle-mediated transport;intracellular protein transport | -1,799015651 | 0,000877569 |
|                         | PF3D7_0934800 | cAMP-dependent protein kinase catalytic subunit | GO:0006468            | protein phosphorylation                                                                   | -1,892132838 | 0,043329245 |
|                         | PF3D7_0713400 | serpentine receptor putative                    | N/A                   | N/A                                                                                       | -1,918988893 | 0,006964473 |
|                         | PF3D7_0609800 | palmitoyltransferase DHHC2 putative             | N/A                   | N/A                                                                                       | -1,98329984  | 0,013900021 |
|                         | PF3D7_0709000 | chloroquine resistance transporter              | GO:0042908            | xenobiotic transport                                                                      | -2,219427148 | 0,003349061 |
|                         | PF3D7_1136500 | casein kinase 1                                 | GO:0006468            | protein phosphorylation                                                                   | -2,494117657 | 0,009970204 |
|                         | PF3D7_1115900 | palmitoyltransferase DHHC9                      | N/A                   | N/A                                                                                       | -2,5114225   | 0,005867392 |
|                         | PF3D7_0108400 | mitochondrial carrier protein putative          | N/A                   | N/A                                                                                       | -2,527935799 | 0,021346347 |
|                         | PF3D7_1476400 | serine/threonine protein kinase FIKK family     | N/A                   | N/A                                                                                       | -2,546504207 | 0,006179259 |
|                         | PF3D7_0301200 | serine/threonine protein kinase FIKK family     | GO:0006468            | protein phosphorylation                                                                   | -2,842801244 | 0,001085369 |
|                         | PF3D7_1027900 | palmitoyltransferase DHHC10 putative            | N/A                   | N/A                                                                                       | -2,919538649 | 0,004796232 |
|                         | PF3D7_1362100 | 14-3-3 protein                                  | N/A                   | N/A                                                                                       | -3,006225903 | 0,017787473 |
|                         | PF3D7_0609100 | zinc transporter ZIP1 putative                  | GO:0030001;GO:0055085 | metal ion transport;transmembrane transport                                               | -3,300073154 | 2,05629E-05 |
|                         | PF3D7_0910600 | SNARE protein                                   | GO:0016192            | vesicle-mediated transport                                                                | -3,594128412 | 0,002391132 |
|                         | PF3D7_1123400 | translation elongation factor EF-1 subunit alph | N/A                   | N/A                                                                                       | -1,01867347  | 0,026267147 |
|                         | PF3D7_1341200 | 60S ribosomal protein L18 putative              | GO:0006412            | translation                                                                               | -1,124688402 | 0,043020466 |
|                         | PF3D7_1317800 | 40S ribosomal protein S19                       | GO:0006412            | translation                                                                               | -1,131666423 | 0,021514754 |
|                         | PF3D7_1242700 | 40S ribosomal protein S17 putative              | GO:0006412            | translation                                                                               | -1,134795394 | 0,047268411 |

|                                     |               |                                                    |            |                          |              |             |
|-------------------------------------|---------------|----------------------------------------------------|------------|--------------------------|--------------|-------------|
| Translation and Ribosome Biogenesis | PF3D7_1424100 | 60S ribosomal protein L5 putative                  | GO:0006412 | translation              | -1,152588191 | 0,019242776 |
|                                     | PF3D7_1460700 | 60S ribosomal protein L27                          | GO:0006412 | translation              | -1,195350398 | 0,04263524  |
|                                     | PF3D7_1338300 | elongation factor 1-gamma putative                 | GO:0006414 | translational elongation | -1,223183949 | 0,016434568 |
|                                     | PF3D7_1244800 | cytoplasmic translation machinery associated prote | N/A        | N/A                      | -1,300167867 | 0,013239267 |
|                                     | PF3D7_1142500 | 60S ribosomal protein L28                          | GO:0006412 | translation              | -1,328514111 | 0,029381577 |
|                                     | PF3D7_0814000 | 60S ribosomal protein L13-2 putative               | GO:0006412 | translation              | -1,331190321 | 0,012661087 |
|                                     | PF3D7_1426000 | 60S ribosomal protein L21                          | GO:0006412 | translation              | -1,33138081  | 0,029740816 |
|                                     | PF3D7_0503800 | 60S ribosomal protein L31                          | GO:0006412 | translation              | -1,332867578 | 0,024324363 |
|                                     | PF3D7_1414300 | 60S ribosomal protein L10 putative                 | GO:0006412 | translation              | -1,344706117 | 0,017787473 |
|                                     | PF3D7_1143400 | translation initiation factor eIF-1A putative      | GO:0006413 | translational initiation | -1,375349666 | 0,019434015 |
|                                     | PF3D7_0322900 | 40S ribosomal protein S3A putative                 | GO:0006412 | translation              | -1,394940878 | 0,015252056 |
|                                     | PF3D7_0317600 | 40S ribosomal protein S11 putative                 | GO:0006412 | translation              | -1,429712611 | 0,017956983 |
|                                     | PF3D7_1331800 | 60S ribosomal protein L23 putative                 | GO:0006412 | translation              | -1,431179891 | 0,019434015 |
|                                     | PF3D7_0312800 | 60S ribosomal protein L26 putative                 | GO:0006412 | translation              | -1,460138587 | 0,018106973 |
|                                     | PF3D7_1004000 | 60S ribosomal protein L13 putative                 | GO:0006412 | translation              | -1,50370556  | 0,020412047 |
|                                     | PF3D7_1105400 | 40S ribosomal protein S4 putative                  | GO:0006412 | translation              | -1,50897663  | 0,004345815 |
|                                     | PF3D7_1144000 | 40S ribosomal protein S21                          | GO:0006412 | translation              | -1,52916788  | 0,006361272 |
|                                     | PF3D7_1465900 | 40S ribosomal protein S3                           | GO:0006412 | translation              | -1,533583158 | 0,006179259 |
|                                     | PF3D7_0304400 | 60S ribosomal protein L44                          | GO:0006412 | translation              | -1,548663445 | 0,036449864 |

|  |               |                                                    |                       |                                                            |              |             |
|--|---------------|----------------------------------------------------|-----------------------|------------------------------------------------------------|--------------|-------------|
|  | PF3D7_0528200 | eukaryotic translation initiation factor 3 subunit | GO:0001732            | formation of cytoplasmic translation initiation complex    | -1,559087691 | 0,012516853 |
|  | PF3D7_0621800 | nascent polypeptide-associated complex subunit alp | N/A                   | N/A                                                        | -1,597234411 | 0,002086713 |
|  | PF3D7_0422400 | 40S ribosomal protein S19                          | GO:0006412            | translation                                                | -1,615830264 | 0,00513642  |
|  | PF3D7_0716800 | eukaryotic translation initiation factor 3 subunit | GO:0001732            | formation of cytoplasmic translation initiation complex    | -1,633008201 | 0,005984697 |
|  | PF3D7_0307100 | 40S ribosomal protein S12 putative                 | GO:0006412            | translation                                                | -1,633448327 | 0,022162398 |
|  | PF3D7_1408600 | 40S ribosomal protein S8e putative                 | GO:0006412            | translation                                                | -1,64622491  | 0,004301051 |
|  | PF3D7_0903900 | 60S ribosomal protein L32                          | GO:0006412            | translation                                                | -1,647632987 | 0,002391132 |
|  | PF3D7_0316800 | 40S ribosomal protein S15A putative                | GO:0006412            | translation                                                | -1,754060072 | 0,002240249 |
|  | PF3D7_0710600 | 60S ribosomal protein L34                          | GO:0006412            | translation                                                | -1,807842059 | 0,000765256 |
|  | PF3D7_0815600 | eukaryotic translation initiation factor 3 subunit | GO:0001732            | formation of cytoplasmic translation initiation complex    | -1,810263118 | 0,00184124  |
|  | PF3D7_1243600 | translation initiation factor SUI1 putative        | GO:0006413            | translational initiation                                   | -1,814702377 | 0,009805268 |
|  | PF3D7_1351400 | 60S ribosomal protein L17 putative                 | GO:0006412            | translation                                                | -1,945906582 | 0,001085369 |
|  | PF3D7_1308300 | 40S ribosomal protein S27                          | GO:0006412            | translation                                                | -1,972444786 | 0,0099575   |
|  | PF3D7_1431700 | 60S ribosomal protein L14 putative                 | GO:0006412            | translation                                                | -2,04501061  | 0,000765256 |
|  | PF3D7_0520000 | 40S ribosomal protein S9 putative                  | GO:0006412            | translation                                                | -2,064291961 | 0,001875927 |
|  | PF3D7_1323400 | 60S ribosomal protein L23                          | GO:0006412            | translation                                                | -2,073724812 | 0,002590299 |
|  | PF3D7_0727200 | cysteine desulfurase putative                      | GO:0044571            | [2Fe-2S] cluster assembly                                  | -1,262670407 | 0,030601773 |
|  | PF3D7_0720700 | phosphoinositide-binding protein putative          | GO:0006886            | intracellular protein transport                            | -1,163261953 | 0,022380124 |
|  | PF3D7_0617100 | AP-2 complex subunit alpha putative                | GO:0006886;GO:0016192 | intracellular protein transport;vesicle-mediated transport | -2,042290004 | 0,003423893 |

|               |                                               |                       |                                                          |              |             |
|---------------|-----------------------------------------------|-----------------------|----------------------------------------------------------|--------------|-------------|
| PF3D7_0209100 | phospholipase A2 putative                     | GO:0016042;GO:0006629 | lipid catabolic process;lipid metabolic process          | -1,536459463 | 0,00564887  |
| PF3D7_0409300 | conserved Plasmodium protein unknown function | GO:0032259            | methylation                                              | -1,553690563 | 0,040527129 |
| PF3D7_1022100 | conserved Plasmodium protein unknown function | GO:0032259            | methylation                                              | -1,810135678 | 0,015359358 |
| PF3D7_1018600 | conserved Plasmodium protein unknown function | GO:0032259;GO:0008033 | methylation;tRNA processing                              | -1,635630171 | 0,004053849 |
| PF3D7_0422300 | alpha tubulin 2                               | GO:0007017            | microtubule-based process                                | -1,162518542 | 0,013640828 |
| PF3D7_0819000 | conserved Plasmodium protein unknown function | GO:0006379;GO:0006378 | mRNA cleavage;mRNA polyadenylation                       | -1,559122313 | 0,006179259 |
| PF3D7_0919000 | nucleosome assembly protein                   | GO:0006334            | nucleosome assembly                                      | -1,339836547 | 0,019761601 |
| PF3D7_1367500 | NADH-cytochrome b5 reductase putative         | GO:0055114            | oxidation-reduction process                              | -1,714192967 | 0,027846213 |
| PF3D7_1321800 | protein transport protein SFT2 putative       | GO:0015031;GO:0016192 | protein transport;vesicle-mediated transport             | -1,246519965 | 0,040840908 |
| PF3D7_1411200 | rhomboid protease ROM8                        | GO:0006508            | proteolysis                                              | -1,251663893 | 0,010207204 |
| PF3D7_0214400 | conserved Plasmodium protein unknown function | GO:0042274            | ribosomal small subunit biogenesis                       | -1,188370196 | 0,034658049 |
| PF3D7_1110200 | pre-mRNA-processing factor 6 putative         | GO:0006396;GO:0000398 | RNA processing;mRNA splicing, via spliceosome            | -1,44451194  | 0,007951166 |
| PF3D7_1250700 | conserved Plasmodium protein unknown function | GO:0006367            | transcription initiation from RNA polymerase II promoter | -2,102129284 | 0,008011926 |
| PF3D7_1315900 | exportin-T putative                           | GO:0006409;GO:0071528 | tRNA export from nucleus;tRNA re-export from nucleus     | -1,250003643 | 0,034658049 |
| PF3D7_1249100 | conserved Plasmodium protein unknown function | GO:0006400            | tRNA modification                                        | -1,280623202 | 0,0195185   |
| PF3D7_1025000 | formin 2 putative                             | N/A                   | N/A                                                      | -1,135924008 | 0,043329245 |
| PF3D7_1447200 | conserved Plasmodium protein unknown function | N/A                   | N/A                                                      | -1,174834926 | 0,023090237 |
| PF3D7_1028500 | conserved Plasmodium protein unknown function | N/A                   | N/A                                                      | -1,20430946  | 0,047359302 |
| PF3D7_0321900 | cyclic amine resistance locus protein         | N/A                   | N/A                                                      | -1,245078539 | 0,046144727 |
| PF3D7_0615600 | conserved Plasmodium protein unknown function | N/A                   | N/A                                                      | -1,268096776 | 0,043329245 |
| PF3D7_1121100 | conserved Plasmodium protein unknown function | N/A                   | N/A                                                      | -1,298795404 | 0,043661457 |

|                  |               |                                                    |     |     |              |             |
|------------------|---------------|----------------------------------------------------|-----|-----|--------------|-------------|
| Unassigned genes | PF3D7_0305300 | conserved Plasmodium membrane protein unknown f    | N/A | N/A | -1,302432278 | 0,039877558 |
|                  | PF3D7_0817900 | high mobility group protein B2                     | N/A | N/A | -1,325334481 | 0,020412047 |
|                  | PF3D7_0830400 | conserved Plasmodium protein unknown function      | N/A | N/A | -1,356494886 | 0,022862716 |
|                  | PF3D7_1110300 | conserved Plasmodium protein unknown function      | N/A | N/A | -1,363096361 | 0,015284118 |
|                  | PF3D7_0322700 | conserved Plasmodium protein unknown function      | N/A | N/A | -1,380918448 | 0,015889808 |
|                  | PF3D7_0209700 | RING zinc finger protein putative                  | N/A | N/A | -1,419472275 | 0,010207204 |
|                  | PF3D7_1233600 | asparagine and aspartate rich protein 1            | N/A | N/A | -1,428660223 | 0,021539238 |
|                  | PF3D7_1474600 | conserved Plasmodium membrane protein unknown f    | N/A | N/A | -1,438558489 | 0,007167424 |
|                  | PF3D7_0505900 | conserved Plasmodium protein unknown function      | N/A | N/A | -1,454143289 | 0,043661457 |
|                  | PF3D7_0918700 | conserved Plasmodium protein unknown function      | N/A | N/A | -1,455444518 | 0,007951166 |
|                  | PF3D7_1251100 | conserved Plasmodium protein unknown function      | N/A | N/A | -1,495128862 | 0,034658049 |
|                  | PF3D7_1138700 | conserved Plasmodium protein unknown function      | N/A | N/A | -1,507916524 | 0,007299904 |
|                  | PF3D7_0508600 | conserved Plasmodium protein unknown function      | N/A | N/A | -1,51200661  | 0,023090237 |
|                  | PF3D7_1250200 | conserved Plasmodium membrane protein unknown f    | N/A | N/A | -1,528854113 | 0,007299904 |
|                  | PF3D7_1013400 | conserved Plasmodium protein unknown function      | N/A | N/A | -1,537329985 | 0,040527129 |
|                  | PF3D7_0912500 | SAP domain-containing protein putative             | N/A | N/A | -1,628507769 | 0,004536048 |
|                  | PF3D7_1218400 | triose or hexose phosphate/phosphate translocator% | N/A | N/A | -1,654663118 | 0,003412973 |
|                  | PF3D7_1002900 | conserved Plasmodium protein unknown function      | N/A | N/A | -1,698461245 | 0,031544699 |
|                  | PF3D7_1445700 | conserved Plasmodium protein unknown function      | N/A | N/A | -1,769296358 | 0,002636373 |
|                  | PF3D7_0934900 | conserved Plasmodium protein unknown function      | N/A | N/A | -1,792289082 | 0,022380124 |

|               |                                                  |     |     |              |             |
|---------------|--------------------------------------------------|-----|-----|--------------|-------------|
| PF3D7_1319400 | conserved Plasmodium protein<br>unknown function | N/A | N/A | -1,808725972 | 0,007900869 |
| PF3D7_0829100 | conserved protein unknown function               | N/A | N/A | -1,831201589 | 0,019434015 |
| PF3D7_1466600 | conserved Plasmodium protein<br>unknown function | N/A | N/A | -1,879859363 | 0,044970584 |
| PF3D7_0216200 | conserved Plasmodium protein<br>unknown function | N/A | N/A | -1,903960025 | 0,015359358 |
| PF3D7_0818600 | BEM46-like protein putative                      | N/A | N/A | -1,930205896 | 0,016291953 |
| PF3D7_1113200 | conserved Plasmodium protein<br>unknown function | N/A | N/A | -1,932572865 | 0,041223375 |
| PF3D7_1247100 | conserved Plasmodium protein<br>unknown function | N/A | N/A | -1,982477316 | 0,04291599  |
| PF3D7_0724500 | conserved Plasmodium protein<br>unknown function | N/A | N/A | -2,042865547 | 0,047268411 |
| PF3D7_1234500 | conserved Plasmodium protein<br>unknown function | N/A | N/A | -2,05467992  | 0,014785595 |
| PF3D7_1204500 | conserved Plasmodium protein<br>unknown function | N/A | N/A | -2,077025686 | 0,027987226 |
| PF3D7_1432900 | SF-assemblin putative                            | N/A | N/A | -2,131795486 | 0,028230984 |
| PF3D7_0404800 | conserved Plasmodium protein<br>unknown function | N/A | N/A | -2,137745229 | 0,048555236 |
| PF3D7_1109400 | essential nuclear protein 1 putative             | N/A | N/A | -2,31629953  | 0,000176083 |
| PF3D7_0823100 | RWD domain-containing protein<br>putative        | N/A | N/A | -2,339921115 | 0,006179259 |
| PF3D7_1333400 | conserved protein unknown function               | N/A | N/A | -2,354696823 | 0,010186438 |
| PF3D7_0517200 | conserved Plasmodium protein<br>unknown function | N/A | N/A | -2,660574293 | 0,000765256 |
| PF3D7_1465400 | conserved Plasmodium protein<br>unknown function | N/A | N/A | -2,734658756 | 0,000873286 |
| PF3D7_0822400 | conserved Plasmodium protein<br>unknown function | N/A | N/A | -2,761599778 | 0,028584315 |
| PF3D7_0911800 | conserved Plasmodium protein<br>unknown function | N/A | N/A | -2,844154799 | 0,003136903 |
| PF3D7_1251000 | conserved Plasmodium protein<br>unknown function | N/A | N/A | -2,970902572 | 0,04291599  |
| PF3D7_0822500 | dynein light chain 1                             | N/A | N/A | -3,678924167 | 0,022380124 |

|  |               |                                               |                       |                                                          |              |             |
|--|---------------|-----------------------------------------------|-----------------------|----------------------------------------------------------|--------------|-------------|
|  | PF3D7_0919000 | nucleosome assembly protein                   | GO:0006334            | nucleosome assembly                                      | -1,339836547 | 0,019761601 |
|  | PF3D7_1367500 | NADH-cytochrome b5 reductase putative         | GO:0055114            | oxidation-reduction process                              | -1,714192967 | 0,027846213 |
|  | PF3D7_1321800 | protein transport protein SFT2 putative       | GO:0015031;GO:0016192 | protein transport;vesicle-mediated transport             | -1,246519965 | 0,040840908 |
|  | PF3D7_1411200 | rhomboid protease ROM8                        | GO:0006508            | proteolysis                                              | -1,251663893 | 0,010207204 |
|  | PF3D7_0214400 | conserved Plasmodium protein unknown function | GO:0042274            | ribosomal small subunit biogenesis                       | -1,188370196 | 0,034658049 |
|  | PF3D7_1110200 | pre-mRNA-processing factor 6 putative         | GO:0006396;GO:0000398 | RNA processing;mRNA splicing, via spliceosome            | -1,44451194  | 0,007951166 |
|  | PF3D7_1250700 | conserved Plasmodium protein unknown function | GO:0006367            | transcription initiation from RNA polymerase II promoter | -2,102129284 | 0,008011926 |
|  | PF3D7_1315900 | exportin-T putative                           | GO:0006409;GO:0071528 | tRNA export from nucleus;tRNA re-export from nucleus     | -1,250003643 | 0,034658049 |
|  | PF3D7_1249100 | conserved Plasmodium protein unknown function | GO:0006400            | tRNA modification                                        | -1,280623202 | 0,0195185   |

**Supplementary Table III : Liste of genes significantly regulated after ACT treatment in 8 *Plasmodium falciparum* isolates (5 pre-treatment, H0; 3 post-treatment, H18). Columns indicate: proposed functional group, Gene ID, gene description, GO term for Biological Process, GO Biological Process description, log<sub>2</sub> fold change (H18 vs H0) and padj (H18 vs H0). Genes upregulated (log<sub>2</sub>FC > 1, padj < 0.05) are highlighted in red, and downregulated genes (log<sub>2</sub>FC < -1, padj < 0.05) are highlighted in green.**
