# Supplementary material
Source: Research Square preprint supplement (doi:10.21203/rs.3.rs-9639294/v1)
Supplement: Supplementary file 2 [file 23a613e9bfb19a8aac491f12.pdf]

**Table I - General characteristics of the recruited children**

| <b>Characteristics</b>               | <b>Uncomplicated malaria (n = 15)</b> |
|--------------------------------------|---------------------------------------|
| Age in month (median; IQR)           | 36 (24-48)                            |
| Male / Female                        | 4 / 11                                |
| Bednet possession†                   | 11 (91.67%)                           |
| Parasitemia D0 p/μl (median,IQR)     | 29271 (21013.5-167000)                |
| Parasitemia D3 p/μl (median,IQR)     | 0 (all negatives)                     |
| ACPR                                 | 100%                                  |
| Hemoglobin level (g/dL) D0 (Mean;SD) | 8.90 (7.70, 10.50)                    |

IQR: Interquartile Range; SD: Standard Deviation; †: n (%)
