# Supplementary material
Source: Research Square preprint supplement (doi:10.21203/rs.3.rs-9639294/v1)
Supplement: Supplementary file 3 [file af591d508d0a763477725d5e.pdf]

*Supplementary Table 1*: *P. falciparum* genomic data from the MalariaGEN repository

| <b>Name</b>    | <b>Origin</b>   |
|----------------|-----------------|
| FG_SRR2098570  | South America   |
| FG_SRR2098613  | South America   |
| FG_SRR2098662  | South America   |
| FG_SRR2098781  | South America   |
| FG_SRR2098782  | South America   |
| FG_SRR2098911  | South America   |
| Gamb_ERS009726 | West Africa     |
| Gamb_ERS009782 | West Africa     |
| Gamb_ERS009966 | West Africa     |
| Gamb_ERS010038 | West Africa     |
| Gamb_ERS010039 | West Africa     |
| Gamb_ERS010040 | West Africa     |
| Gamb_ERS010041 | West Africa     |
| Ghan_ERS188107 | West Africa     |
| Ghan_ERS188114 | West Africa     |
| Ghan_ERS193645 | West Africa     |
| Ghan_ERS193655 | West Africa     |
| Ghan_ERS193670 | West Africa     |
| Ghan_ERS193675 | West Africa     |
| Ghan_ERS224913 | West Africa     |
| Ghan_ERS246744 | West Africa     |
| Ghan_ERS246765 | West Africa     |
| Ghan_ERS346749 | West Africa     |
| Ghan_ERS346792 | West Africa     |
| Ghan_ERS360498 | West Africa     |
| Ghan_ERS360506 | West Africa     |
| Ghan_ERS360514 | West Africa     |
| Ghan_ERS360530 | West Africa     |
| Ghan_ERS360538 | West Africa     |
| Ghan_ERS360546 | West Africa     |
| Ghan_ERS360554 | West Africa     |
| Ghan_ERS360562 | West Africa     |
| Guin_ERS041968 | West Africa     |
| Guin_ERS041970 | West Africa     |
| Guin_ERS041972 | West Africa     |
| Guin_ERS041974 | West Africa     |
| Guin_ERS041976 | West Africa     |
| Guin_ERS042038 | West Africa     |
| Guin_ERS042050 | West Africa     |
| Guin_ERS042054 | West Africa     |
| Guin_ERS042057 | West Africa     |
| Guin_ERS042074 | West Africa     |
| Guin_ERS042077 | West Africa     |
| Guin_ERS042079 | West Africa     |
| Guin_ERS042083 | West Africa     |
| Laos_ERS174588 | South East Asia |
| Laos_ERS174592 | South East Asia |
| Laos_ERS174599 | South East Asia |

|                |                 |
|----------------|-----------------|
| Laos_ERS174602 | South East Asia |
| Laos_ERS174613 | South East Asia |
| Laos_ERS174614 | South East Asia |
| Mawi_ERS164642 | East Africa     |
| Mawi_ERS164686 | East Africa     |
| Mawi_ERS168594 | East Africa     |
| Mawi_ERS168596 | East Africa     |
| Nige_ERS199640 | West Africa     |
| Nige_ERS199645 | West Africa     |
| Nige_ERS199650 | West Africa     |
| Nige_ERS347697 | West Africa     |
| OD003-H0       | OD Benin        |
| OD005-H0       | OD Benin        |
| OD005-H18      | OD Benin        |
| OD013-H0       | OD Benin        |
| OD014-H0       | OD Benin        |
| OD017-H0       | OD Benin        |
| OD017-H18      | OD Benin        |
| OD018-H0       | OD Benin        |
| OD019-H0       | OD Benin        |
| OD021-H0       | OD Benin        |
| OD022-H0       | OD Benin        |
| OD022-H18      | OD Benin        |
| OD024-H0       | OD Benin        |
| OD025-H0       | OD Benin        |
| OD025-H18      | OD Benin        |
| OD026-H0       | OD Benin        |
| OD027-H0       | OD Benin        |
| OD027-H18      | OD Benin        |
| OD029-H0       | OD Benin        |
| OD029-H18      | OD Benin        |
| OD031-H0       | OD Benin        |
| Tanz_SRR530499 | East Africa     |
| Tanz_SRR629051 | East Africa     |
| Tanz_SRR629053 | East Africa     |
| Tanz_SRR629071 | East Africa     |
| Tanz_SRR629074 | East Africa     |
| Viet_ERS142875 | South East Asia |
| Viet_ERS143424 | South East Asia |
| Viet_ERS143469 | South East Asia |
| Viet_ERS143471 | South East Asia |
| Viet_ERS143473 | South East Asia |
| Viet_ERS143497 | South East Asia |
