# Supplementary material
Source: Research Square preprint supplement (doi:10.21203/rs.3.rs-9639294/v1)
Supplement: Supplementary file 4 [file c5ede728c8692b2fff451680.pdf]

|    | A                                                                                                                                   | B           | C                                      | D     | E                       | F               | G    | H            | I             | J          | K      |
|----|-------------------------------------------------------------------------------------------------------------------------------------|-------------|----------------------------------------|-------|-------------------------|-----------------|------|--------------|---------------|------------|--------|
| 1  | Sample                                                                                                                              | mdr1        | crt                                    | k13   | dhps                    | dhfr            | cytb | plasmepsinII | plasmepsinIII | coronin    | px1    |
| 2  | OD003-H0                                                                                                                            | wt          | M74I,N75E,K76T,Q271E                   | K189T | wt                      | N51I,C59R,S108N | wt   | Q442H        | wt            | S183G      | M1701I |
| 3  | OD005-H0                                                                                                                            | Y184F       | M74I,N75E,K76T,A220S,Q271E,I356T,R371I | wt    | wt                      | N51I,C59R,S108N | wt   | Q442H        | wt            | S559Y      | M1701I |
| 4  | OD005-H18                                                                                                                           | Y184F       | M74I,N75E,K76T,A220S,Q271E,I356T,R371I | wt    | wt                      | N51I,C59R,S108N | wt   | Q442H        | wt            | S559Y      | M1701I |
| 5  | OD013-H0                                                                                                                            | wt          | M74I,N75E,K76T,A220S,Q271E,I356T,R371I | K189T | wt                      | N51I,C59R,S108N | wt   | I413V        | wt            | S183G      | wt     |
| 6  | OD014-H0                                                                                                                            | wt          | M74I,N75E,K76T,A220S,Q271E,R371I       | K189T | wt                      | N51I,C59R,S108N | wt   | Q442H        | wt            | P76S,V424I | wt     |
| 7  | OD017-H0                                                                                                                            | Y184F       | M74I,N75E,K76T,A220S,Q271E,I356T,R371I | wt    | wt                      | N51I,C59R,S108N | wt   | wt           | wt            | S183G      | wt     |
| 8  | OD017-H18                                                                                                                           | Y184F       | M74I,N75E,K76T,A220S,Q271E,I356T,R371I | wt    | wt                      | N51I,C59R,S108N | wt   | wt           | wt            | S183G      | wt     |
| 9  | OD018-H0                                                                                                                            | Y184F       | M74I,N75E,K76T,A220S,Q271E,I356T,R371I | wt    | S436A                   | N51I,C59R,S108N | wt   | Q442H        | wt            | wt         | M1701I |
| 10 | OD019-H0                                                                                                                            | Y184F,F938Y | M74I,N75E,K76T,A220S,Q271E,I356T,R371I | V589I | wt                      | N51I,C59R,S108N | wt   | wt           | wt            | S183G      | M1701I |
| 11 | OD021-H0                                                                                                                            | wt          | M74I,N75E,K76T,A220S,Q271E,I356T,R371I | K189T | I431V,S436A,A581G,A613S | N51I,C59R,S108N | wt   | Q442H        | wt            | S183G      | M1701I |
| 12 | OD022-H0                                                                                                                            | Y184F,N660D | M74I,N75E,K76T,A220S,Q271E,R371I       | K189T | wt                      | N51I,C59R,S108N | wt   | wt           | wt            | P76S       | M1701I |
| 13 | OD022-H18                                                                                                                           | Y184F,N660D | M74I,N75E,K76T,A220S,Q271E,R371I       | K189T | wt                      | N51I,C59R,S108N | wt   | wt           | wt            | P76S       | M1701I |
| 14 | OD024-H0                                                                                                                            | Y184F,N504K | M74I,N75E,K76T,A220S,Q271E,I356T,R371I | wt    | wt                      | N51I,C59R,S108N | wt   | Q442H        | wt            | wt         | M1701I |
| 15 | OD025-H0                                                                                                                            | wt          | M74I,N75E,K76T,A220S,Q271E,I356T,R371I | K189T | S436A                   | N51I,C59R,S108N | wt   | V420L,Q442H  | wt            | S183G      | M1701I |
| 16 | OD025-H18                                                                                                                           | wt          | M74I,N75E,K76T,A220S,Q271E,I356T,R371I | K189T | S436A                   | N51I,C59R,S108N | wt   | V420L,Q442H  | wt            | S183G      | M1701I |
| 17 | OD026-H0                                                                                                                            | Y184F       | M74I,N75E,K76T,A220S,Q271E             | K189T | S436A,A613S             | N51I,C59R,S108N | wt   | Q442H        | wt            | P76S,A482S | M1701I |
| 18 | OD027-H0                                                                                                                            | Y184F,N660D | M74I,N75E,K76T,A220S,Q271E,R371I       | K189T | wt                      | N51I,C59R,S108N | wt   | wt           | wt            | P76S       | M1701I |
| 19 | OD027-H18                                                                                                                           | Y184F,N660D | M74I,N75E,K76T,A220S,Q271E,R371I       | K189T | wt                      | N51I,C59R,S108N | wt   | wt           | wt            | P76S       | M1701I |
| 20 | OD029-H0                                                                                                                            | wt          | 74NI,75NI,75NI,Q271E                   | wt    | wt                      | N51I,C59R,S108N | wt   | wt           | wt            | wt         | 170NI  |
| 21 | OD029-H18                                                                                                                           | wt          | M74I,N75E,K76T,Q271E                   | wt    | wt                      | N51I,C59R,S108N | wt   | wt           | wt            | wt         | M1701I |
| 22 | OD031-H0                                                                                                                            | N86Y,Y184F  | M74I,N75E,K76T,A220S,Q271E,I356T,R371I | K189T | wt                      | N51I,C59R,S108N | wt   | T154I,Q442H  | wt            | S183G      | wt     |
| 23 |                                                                                                                                     |             |                                        |       |                         |                 |      |              |               |            |        |
| 24 | <b>Supplementary Table II: Mutations identified in the genomes of different isolates for the following drug-resistance markers:</b> |             |                                        |       |                         |                 |      |              |               |            |        |
| 25 | <b>mdr1, crt, k13, dhps, dhfr, cytb, plasmepsin II, plasmepsin III, coronin, and px1.</b>                                           |             |                                        |       |                         |                 |      |              |               |            |        |
| 26 | <i>WT = wild type; NI = no information available.</i>                                                                               |             |                                        |       |                         |                 |      |              |               |            |        |
